# Supplementary material for: Investigation of K-ion storage performances in a bismuth sulfide-carbon nanotube composite anode
Source: Royal Society of Chemistry journal article supplement (doi:10.1039/d0ra00374c), 2020-01-01
Supplement: d0ra00374c1.pdf [file d0ra00374c1.pdf]

COMMUNICATION

## Investigation of K-ion storage performances in bismuth sulfide-carbon nanotube composite anode

Received 00th January 20xx,  
 Accepted 00th January 20xx

DOI: 10.1039/x0xx00000x

Jang-Yeon Hwang,<sup>a</sup> Rudra Kumar,<sup>b</sup> Hee Min Kim,<sup>b</sup> Muhammad Hilmy Alfaruqi,<sup>a</sup> JaeKook Kim,<sup>a</sup> Yang-Sun<sup>\*b</sup>

Herein, we synthesize a nanostructured bismuth sulfide/carbon nanotube composite and demonstrate its potential use as high-capacity anode for K-ion battery, for the first time. The composite anode shows reversible K-ion storage capabilities that are supported by density functional theory calculations.

K-ion batteries (KIBs) have attracted attention as a promising alternative to commercial Li-ion batteries (LIBs) because of their low cost, earth abundance, and low redox potential (Li: -3.04 V and K: -2.93 V vs standard hydrogen electrode), along with the similar chemical properties between K and Li.<sup>1</sup> KIBs also possess an electrical energy storage mechanism similar to LIBs, which has accelerated the development of KIBs.<sup>2</sup>

To date, alloys of group 14 or 15 elements in the periodic table, as defined by their corresponding alloying reactions, have been considered as potential candidates for high-capacity anodes in KIBs.<sup>3</sup> Owing to the large volume changes of the alloying anode in the K-system (mainly caused by large ionic size of K<sup>+</sup> (1.38 Å)),<sup>4</sup> most alloying anodes have been designed and synthesized via structural modulation with carbon-conducting agents, which are very important for buffering volume strain as well as creating pathways for electrical conduction.<sup>5-9</sup> McCulloch et al. investigated the electrochemical behavior of Sb-C composite electrodes as KIB anode.<sup>10</sup> Through the formation of cubic K<sub>3</sub>Sb phase, the Sb-C composite electrode delivered a high reversible capacity of 650 mAh g<sup>-1</sup>. Sultana et al. confirmed the alloying-dealloying reaction between Sn and K by forming the K<sub>2</sub>Sn<sub>5</sub> and K<sub>4</sub>Sn<sub>23</sub> compound.<sup>11</sup> Recently, Huang et al. determined the potassium-storage mechanism in Bi.<sup>12</sup> In the K<sub>3</sub>Bi-K<sub>3</sub>Bi<sub>2</sub>-KBi<sub>2</sub>-Bi dealloying-alloying mechanism, the Bi electrode delivers high potassium storage capacity of 400 mAh g<sup>-1</sup>. On the basis of conversion and sequential alloying-dealloying reactions, SnS<sub>2</sub>-rGO and Sb<sub>2</sub>S<sub>3</sub>-graphene composite electrodes delivered high reversible capacities as KIB anode.<sup>13,14</sup> On the other hand, in the previously reported LIB and sodium-ion battery (SIB) system, bismuth sulfide (Bi<sub>2</sub>S<sub>3</sub>) was

also considered a potential electrode material for high capacity and low-cost electrode materials; however, their development is still infancy.<sup>15-17</sup> In addition, to the best of our knowledge, K-storage capability in Bi<sub>2</sub>S<sub>3</sub> has not yet been reported. Herein, we synthesize nanostructured Bi<sub>2</sub>S<sub>3</sub> carbon nanotube (CNT) composites and investigate their possible electrochemical K-ion storage behaviors in KIBs for the first time.

The nanostructured Bi<sub>2</sub>S<sub>3</sub> and Bi<sub>2</sub>S<sub>3</sub>-CNT composite was synthesized via one-step hydrothermal method. The synthesis details are illustrated in Fig. 1. In a typical process, Bi(NO<sub>3</sub>)<sub>3</sub> was first dissolved in deionized (D.I.) water and mixed with CH<sub>4</sub>N<sub>2</sub>S. For the composite anode, to disperse the CNTs in the solution, isopropyl alcohol was added with ultrasonication for 15 min. Then, it was directly transferred to a Teflon-sealed stainless steel autoclave and held at 180 °C for 10 h. The resultant powder was washed with ethanol and D.I. water, and the final products were obtained after drying at 80 °C overnight. The structure of the as-prepared Bi<sub>2</sub>S<sub>3</sub> and Bi<sub>2</sub>S<sub>3</sub>-CNT composite powder was confirmed using X-ray diffraction (PANalytical, Empyrean) with a Cu-Kα radiation source (λ = 1.5418 Å). To prepare composite electrodes, the Bi<sub>2</sub>S<sub>3</sub>-CNT powder, acetylene black, and poly(vinylidene fluoride) were mixed with N-methyl pyrrolidone at a ratio of 8:1:1 by weight. The obtained slurry was pasted on the copper foil as a current collector and dried without air exposure at 80 °C.

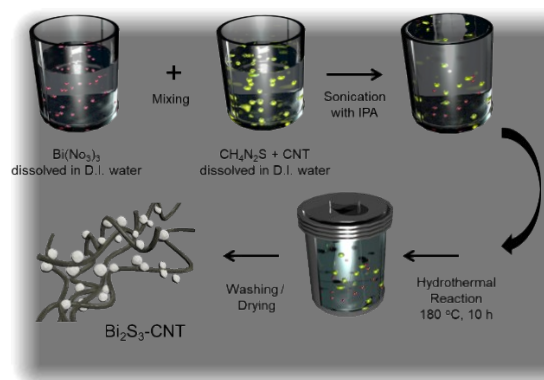

Fig. 1 Schematic illustration of the synthesis process of Bi<sub>2</sub>S<sub>3</sub>-CNT composite.

<sup>a</sup> Department of Materials Science and Engineering, Chonnam National University, Gwangju, 61186, Republic of Korea

<sup>b</sup> Department of Energy Engineering, Hanyang University, Seoul, 04763, Republic of Korea

Electronic Supplementary Information (ESI) available: [details of any supplementary information available should be included here]. See DOI: 10.1039/x0xx00000x

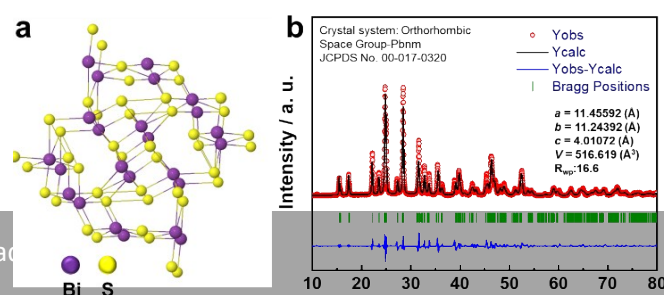

**Fig. 2** (a) Illustration of typical orthorhombic structure of  $\text{Bi}_2\text{S}_3$ . (b) Rietveld refinement of the XRD pattern for  $\text{Bi}_2\text{S}_3$ -CNT powder. Morphology of  $\text{Bi}_2\text{S}_3$ -CNT. (c) SEM and (d) TEM images with EDX mapping.

To confirm the morphological properties and elemental distributions in the composite material, scanning electron microscopy (SEM) and transmission electron microscopy (TEM) with energy dispersive X-ray (EDX) mapping were conducted, respectively. The electrochemical behavior was examined in R2032-type coin cells with K metal as the counter electrode (CE) filled with 1M mol  $\text{dm}^{-3}$  KFSI ethylene carbonate:diethyl carbonate (1:1 v/v) solution at room temperature. For comparison, bare  $\text{Bi}_2\text{S}_3$  sample was also synthesized and characterized via same procedures.

Fig. 2a shows the typical orthorhombic structure of  $\text{Bi}_2\text{S}_3$  with  $Pbnm$  symmetry. Fig. 2b reveals the Rietveld refinement of the high-resolution XRD pattern of the  $\text{Bi}_2\text{S}_3$  composite (JCPDS No. 00-017-0320). The Rietveld refinement of the XRD pattern of  $\text{Bi}_2\text{S}_3$ -CNTs yielded lattice parameters  $a$ ,  $b$ , and  $c$  of 11.45592, 11.24392, and 4.01072 Å, respectively. The accuracy of the structural model obtained by Rietveld refinement was confirmed by the small reliability factors ( $R_{\text{wp}}$ : 16.6%). In addition to  $\text{Bi}_2\text{S}_3$ , the  $\text{Bi}_2\text{S}_3$ -CNT composite showed a pure orthorhombic structure belonging to the  $Pbnm$  space group

**Fig. 3** Comparison of experimental charge–discharge curves of (a) the  $\text{Bi}_2\text{S}_3$  anode and (b)  $\text{Bi}_2\text{S}_3$ -CNT anode in the voltage range 0.01–3.0 V at 10 mA  $\text{g}^{-1}$  and predicted voltage curves using first-principles calculation.

without any impurities and secondary phase (Fig. S1). The weight content of CNTs in the composite was determined to be ~10.2 wt.% according to thermogravimetric analysis, as shown in Fig. S2. We characterized the  $\text{Bi}_2\text{S}_3$ -CNT composite by SEM and TEM. As seen in Fig. 2c (SEM image), spherical  $\text{Bi}_2\text{S}_3$  nanoparticles in the range 70–100 nm are highly interconnected through a web of CNTs that ensure the flow of electrons. Fig. 2d shows the TEM image of the  $\text{Bi}_2\text{S}_3$ -CNT composite. The elemental results clearly reveal the existence of carbon, bismuth, and sulfur element in the composite.

Fig. 3a shows that the predicted voltage curves using first-principles calculation overlap with the first charge-discharge voltage profile of the  $\text{Bi}_2\text{S}_3$  electrode in the voltage range 0.01–3.0 V.

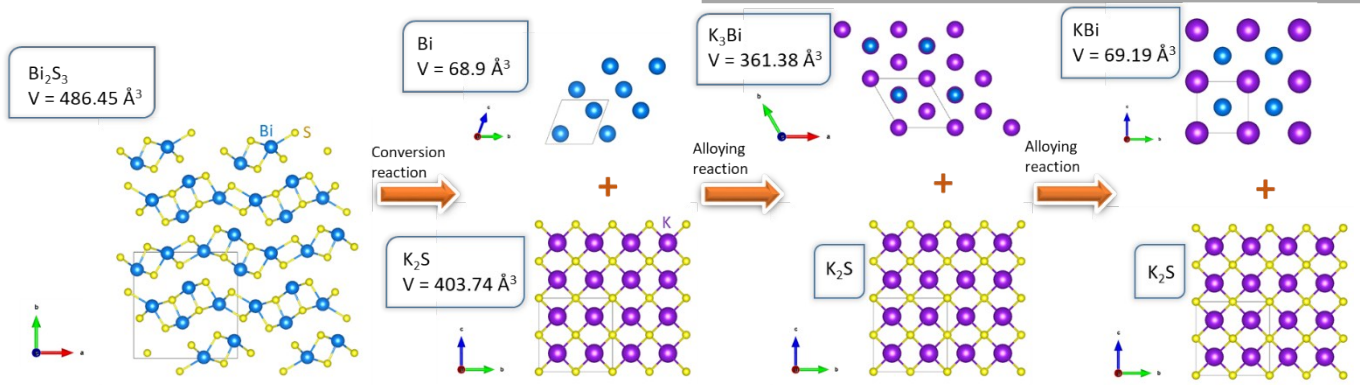

**Fig. 4** Electrochemical K storage mechanism of  $\text{Bi}_2\text{S}_3$  in the composite electrode and volume changes. The insets show the detailed crystalline parameters computed in previous reports on LIB and SIBs.<sup>5,16</sup>  $\text{Bi}_2\text{S}_3$  typically undergoes subsequent conversion and alloying reactions during the

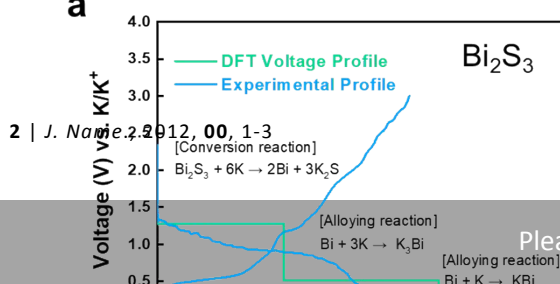

charge-discharge process. On the basis of those reaction mechanisms, we first predicted that the electrochemical reaction of  $\text{Bi}_2\text{S}_3$  in KIB is likely proceeds as follows:

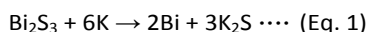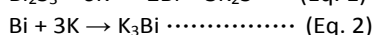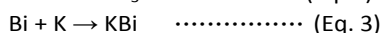

In the first reaction step,  $\text{Bi}_2\text{S}_3$  reacts with K to form metallic Bi and potassium sulfide. Then, metallic Bi and K react to form the K-Bi alloy compounds  $\text{K}_3\text{Bi}$  and  $\text{KBi}$ . Note that the discharge products of Bi,  $\text{K}_2\text{S}$ ,  $\text{K}_3\text{Bi}$ , and  $\text{KBi}$  were selected based on stable species presence in the calculated phase diagrams of K-Bi-S ternary and K-Bi binary systems, which were obtained from Materials Projects.<sup>18,19</sup> Through the conversion and alloying reaction, the theoretical capacity of Eq. 1, 2, and 3 were calculated as 312, 384, and 145  $\text{mA h g}^{-1}$ , respectively. To validate our proposed mechanism, we performed voltage calculations using the two-phase coexistence method.<sup>20</sup> Our predicted theoretical voltages for the reactions  $\text{Bi}_2\text{S}_3 + 6\text{K} \rightarrow 2\text{Bi} + 3\text{K}_2\text{S}$ ,  $\text{Bi} + 3\text{K} \rightarrow \text{K}_3\text{Bi}$ , and  $\text{Bi} + \text{K} \rightarrow \text{KBi}$  were 1.28, 0.51, and 0.25 V, respectively. As seen in Fig. 3, the  $\text{Bi}_2\text{S}_3$  electrode delivered a high discharge-charge (potassiation-depotassiation) capacity of 820 and 650  $\text{mAh g}^{-1}$ , respectively. The calculated voltages are in good agreement with experimental voltage profiles of  $\text{Bi}_2\text{S}_3$  anode. The calculated capacity values in each potassiation step were nearly identical to those obtained from density functional theory (DFT) calculations. The calculation methods are provided in the supplementary information.<sup>21-23</sup> The  $\text{Bi}_2\text{S}_3$ -CNT composite electrode delivered much higher discharge-charge capacity of 900  $\text{mAh g}^{-1}$  and 750  $\text{mAh g}^{-1}$ , respectively (see Fig. 3b). It should be noted that the irreversible capacity over the theoretical value during the potassiation step was mainly attributed to the formation of a solid-electrolyte interphase layer induced by CNTs.<sup>24</sup> As observed in SEM and TEM images, the interconnected CNT network in the composite provides effective conductive paths for rapid electron transport, which are likely to assist  $\text{K}^+$  ion storage in  $\text{Bi}_2\text{S}_3$ . In general, conversion-alloying-based electrodes are known to deliver high capacities but experience severe volume changes owing to the continuous self-pulverization of electrode materials during the electrochemical charge-discharge reaction. This phenomenon was observed in the  $\text{Bi}_2\text{S}_3$  electrode upon cycling in LIBs,<sup>11</sup> which resulted in capacity degradation with prolonged cycles. In the case of KIB, our DFT calculations (Fig. 4) suggest that in the first stage,  $\text{Bi}_2\text{S}_3$  formed the  $\text{K}_2\text{S}$  phase with unit cell volume of 403.74  $\text{\AA}^3$ . Further potassiation led to the formation of  $\text{K}_3\text{Bi}$  from metallic Bi with unit cell volume of 361.38  $\text{\AA}^3$ , followed by the formation of  $\text{KBi}$  phase in the final stage. This calculation revealed the high volume expansion of the  $\text{Bi}_2\text{S}_3$  electrode in the KIB system. Such large volume changes often accelerate electrode damage, which leads to the loss of electrical contact, and subsequently rapid capacity fading.

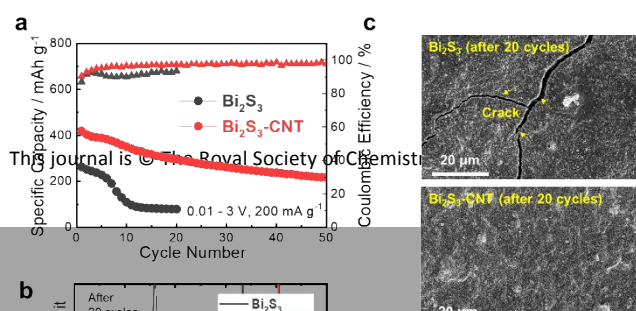

Fig. 5 (a) Cycle life test of  $\text{Bi}_2\text{S}_3$  and  $\text{Bi}_2\text{S}_3$ -CNT electrodes in the voltage range 0.01–3.0 V at 200  $\text{mA g}^{-1}$ . (b) XRD patterns (c) SEM images of cycled  $\text{Bi}_2\text{S}_3$  and  $\text{Bi}_2\text{S}_3$ -CNT electrode after 20 cycles. (d) TEM images of cycled  $\text{Bi}_2\text{S}_3$ -CNT particles after 20 cycles.

Figure 5a shows the cycle life test of  $\text{Bi}_2\text{S}_3$  and  $\text{Bi}_2\text{S}_3$ -CNT electrodes in the voltage range 0.01–3.0 V at 200  $\text{mA g}^{-1}$ . While  $\text{Bi}_2\text{S}_3$  only delivered a charge capacity of 250  $\text{mAh g}^{-1}$  because of the sluggish kinetics of K-ions with  $\text{Bi}_2\text{S}_3$ , the capacity reached 450  $\text{mAh g}^{-1}$  for the  $\text{Bi}_2\text{S}_3$ -CNT composite electrode. After 10 cycles, the  $\text{Bi}_2\text{S}_3$  electrode showed a drastic capacity loss; after 20 cycles, it had very limited capacity. Moreover, after the first few cycles, the CE of above 98% was stabilized for the  $\text{Bi}_2\text{S}_3$ -CNT composite electrode, while the CE for the  $\text{Bi}_2\text{S}_3$  electrode was much worse; this corresponds to the typical trend of capacity decay in the cycling stability test for the two electrodes. The sudden capacity decay of the  $\text{Bi}_2\text{S}_3$  electrode is mainly attributed to the huge volume changes during repeated charge-discharge process observed in the DFT calculation results in Fig. 4. In contrast, the CNT encapsulants provided a strong buffer effect that mitigated the large volume changes and pulverizations of  $\text{Bi}_2\text{S}_3$  particles upon cycling, and enabled more efficient electronic conduction of the whole electrode during cycling. As a result, the  $\text{Bi}_2\text{S}_3$ -CNT electrode demonstrated much better cycling stability over 50 cycles. **The electro-conducting CNT matrix enhances the electric conductivity of  $\text{Bi}_2\text{S}_3$  and thus has been effective in overcoming the poor potassium intercalation ability in  $\text{Bi}_2\text{S}_3$ .** To determine the correlation between the electrochemical performance and structural durability of these electrode materials, XRD, SEM, and TEM analyses were carried out with cycled (after 20 cycles)  $\text{Bi}_2\text{S}_3$  and  $\text{Bi}_2\text{S}_3$ -CNT composite electrodes. As expected from the different cycling stability between the two electrodes, the  $\text{Bi}_2\text{S}_3$  electrode experienced severe structural damage after cycling. A noticeable broadening of the XRD peaks for the  $\text{Bi}_2\text{S}_3$  electrode relative to the  $\text{Bi}_2\text{S}_3$ -CNT composite electrode was observed. (Fig. 5b) The  $\text{Bi}_2\text{S}_3$ -CNT composite electrode retained its original crystal structure after cycling, while an amorphous phase was found in the cycled  $\text{Bi}_2\text{S}_3$  electrode. As seen in SEM images (Fig. 5c), the cycled  $\text{Bi}_2\text{S}_3$  electrode had extensive cracking on the surface, whereas the cycled  $\text{Bi}_2\text{S}_3$ -CNT electrode exhibited no signs of cracking. TEM examination of the  $\text{Bi}_2\text{S}_3$ -CNT electrode between before and after cycling further revealed that CNTs play an important role in suppressing the periodic volume

expansion of  $\text{Bi}_2\text{S}_3$  during cycling (Fig. 5d).<sup>25</sup> Although the  $\text{Bi}_2\text{S}_3$  particles in the composite experienced large volume changes between before and after 20 cycles,  $\text{Bi}_2\text{S}_3$  nanoparticles were well encapsulated within the CNT matrix. The CNT encapsulants provided a strong buffer effect that mitigated the large volume changes and pulverizations of  $\text{Bi}_2\text{S}_3$  particles upon cycling, and enabled more efficient electronic conduction of the whole electrode during cycling. Compare to the  $\text{Bi}_2\text{S}_3$  electrode, the  $\text{Bi}_2\text{S}_3$ -CNT electrode showed the much lower resistances after cycling; this clearly explain that CNT plays an important role to improve electronic conductivity and fast  $\text{K}^+$  ion diffusion kinetics (Fig. S3). The XRD, SEM, TEM and EIS results clearly demonstrate the superior structural stability of the  $\text{Bi}_2\text{S}_3$ -CNT composite and its enhanced electrochemical K-storage performance.

In summary, we demonstrated the potential use of  $\text{Bi}_2\text{S}_3$ -CNT as anode material for KIB. A combination of experimental and first-principles calculations was used to investigate the overall K-storage mechanism of  $\text{Bi}_2\text{S}_3$ . The CNT matrix in this composite anode not only provides electronic conductivity but also decreases the absolute stress/strain, and accommodates a period of large volume changes during the potassiation-depotassiation process. As a result,  $\text{Bi}_2\text{S}_3$ -CNTs delivered high capacity and good cycling stability. We hope that this study provides insight on the design of new electrode materials and contributes toward the realization of KIBs as a sustainable next-generation battery.

This work was supported by the National Research Foundation of Korea grant funded by the Korea government Ministry of Education and Science Technology (NRF-2018R1A2B3008794) and (NRF-2018R1A5A 1025224) and (NRF-2019R1F1A1063538).

## Conflicts of interest

There are no conflicts to declare.

## Notes and references

- J.-Y. Hwang, S.-T. Myung and Y.-K. Sun, *Adv. Funct. Mater.*, 2018, 2, 182938.
- K. Kubota, M. Dahbi, T. Hosaka, H. Kumakura, S. Komaba, *Chem. Record*, 2018, 18, 459-479.
- W. Zhang, W. K. Pang, V. Sencadas, Z. Guo, *Joule*, 2018, 2, 1534-1547.
- Q. Zhang, J. Mao, W. K. Pang, T. Zheng, V. Sencadas, Y. Chen, Y. Liu, Z. Guo, *Adv. Energy Mater.* 2018, 8, 1703288.
- W. Zang, J. Mao, S. Li, Z. Chen, Z. Guo, *J. Am. Chem. Soc.* 2017, 139, 3316.
- Z. Ma, T. Li, Y. L. Huang, J. Liu, Y. Zhou, D. Xue, *RSC Adv*, 2013, 3, 7398-7402.
- Z.S. Ma, Z. C. Xie, Y. Wang, P. P. Zhang, Y. Pan, Y.C. Zhou, C. Lu, *J. Power Sources*, 2015, 290, 114-122.
- C. Wang, Z. Ma, Y. Wang, C. Lu, *J. Electrochem. Soc.*, 2016, 163, A1157-A1163.
- Z. Ma, Z. Xie, Y. Wang, C. Lu, *J. Scripta. Mat.*, 2017, 127, 33-36.
- W. D. McCulloch, X. Ren, M. Yu, Z. Huang, Y. Wu, *ACS Appl. Mater. Interfaces* 2015, 7, 26158.
- I. Sultana, M. Rahman, T. Ramireddy, Y. Chen, A. Glushenkov, *J. Mater. Chem. A* 2017, 5, 23506.
- J. Huang, X. Lin, H. Tan, B. Zhang, *Adv. Energy Mater.* 2018, 8, 1703496.
- V. Lakshmi, Y. Chen, A. A. Mikhaylov, A. G. Medvedev, I. Sultana, M. Rahman, O. Lev, P. V. Prikhodchenko, A. M. Glushenkov, *Chem. Commun.* 2017, 53, 8272.
- Y. Lu, J. Chen, *Sci. China: Chem.* 2017, 60, 1533.
- L. Zhao, H.-H. Wu, C. Yang, Q. Zhang, G. Zhong, Z. Zheng, H. Chen, J. Wang, K. he, B. Wnag, T. Zhu, X. C. Zeng, M. Liu, M.-S. Wang, *ACS Nano*, 2018, 12, 12597-12611.
- W. Yang, H. Wnag, T. Liu, L. Gao, *Mater. Lett.*, 2016, 167, 102-105.
- B. Long, Z. Qiao, J. Zhang, S. Zhang, M. S. Balogun, J. Lu, S. Song, Y. Tong, *J. Mater. Chem. A*, 2019, 7, 11370-11378.
- S. P. Ong, L. Wang, B. kang, G. Ceder, *Chem. Mater.* 2008, 20, 5, 1798-1807.
- A. Jain, G. Hautier, S. P. Ong, C. J. Moore, C. C. Fischer, K. A. Persson, G. Ceder, *Phys. Rev. B*, 2011, 84, 045115.
- I. A. Courtney, J. S. Tse, O. Mao, J. Hafner, J. R. Dhan, *Phys. Rev. B*, 1998, 58, 15583.
- P. Giannozzi et al., *J. Phys.: Condens. Matter.*, 2009, 21, 395502.
- J. P. Perdew, A. Ruzsinszky, G. I. Csonka, O. A. Vydrov, G. E. Scuseria, L. A. Constantin, X. Zhou, K. Burke, *Phys. Rev. Lett.* 100, 136406.
- K. Momma, F. Izumi, *J. Appl. Crystallogr.*, 2011, 44, 1272.
- J.-Y. Hwang, S.-T. Myung, J.-H. Lee, A. Abouimrane, I. Belharouak, Y.-K. Sun, *Nano Energy*, 2015, 16, 218-226.
- J. Ni, Y. Zhao, T. Liu, H. Zheng, L. Gao, C. Yan, L. Li, *Adv. Energy Mater.* 2014, 1400798.
